# Supplementary material for: Association of Intrapatient Variability of Tacrolimus Concentration With Early Deterioration of Chronic Histologic Lesions in Kidney Transplantation
Source: PubMed Central journal article supplement — Transplant Direct. 2019 May 22;5(6):e455. doi: 10.1097/TXD.0000000000000899 (PMC6553623; doi:10.1097/txd.0000000000000899), 2019-05-22

Figure S1. The scatterplot of CV in the Entire Cohort

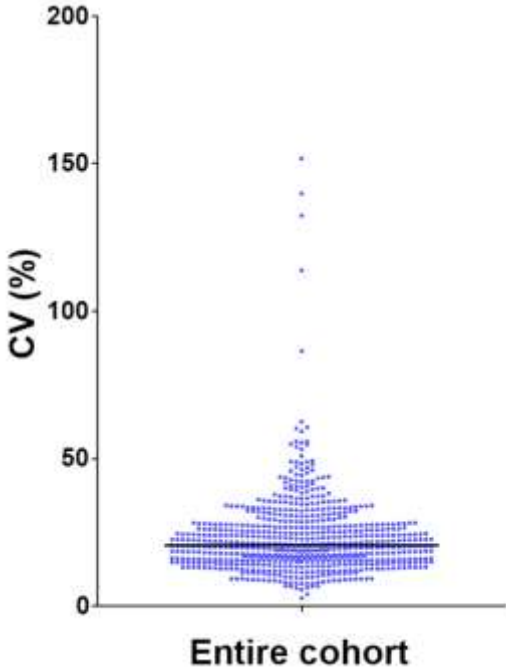

Figure S2. Progression of individual chronic scores in the Histology cohort. Effects of IPV on the progression of histologic scores were compared by ANCOVA for controlling the baseline scores.

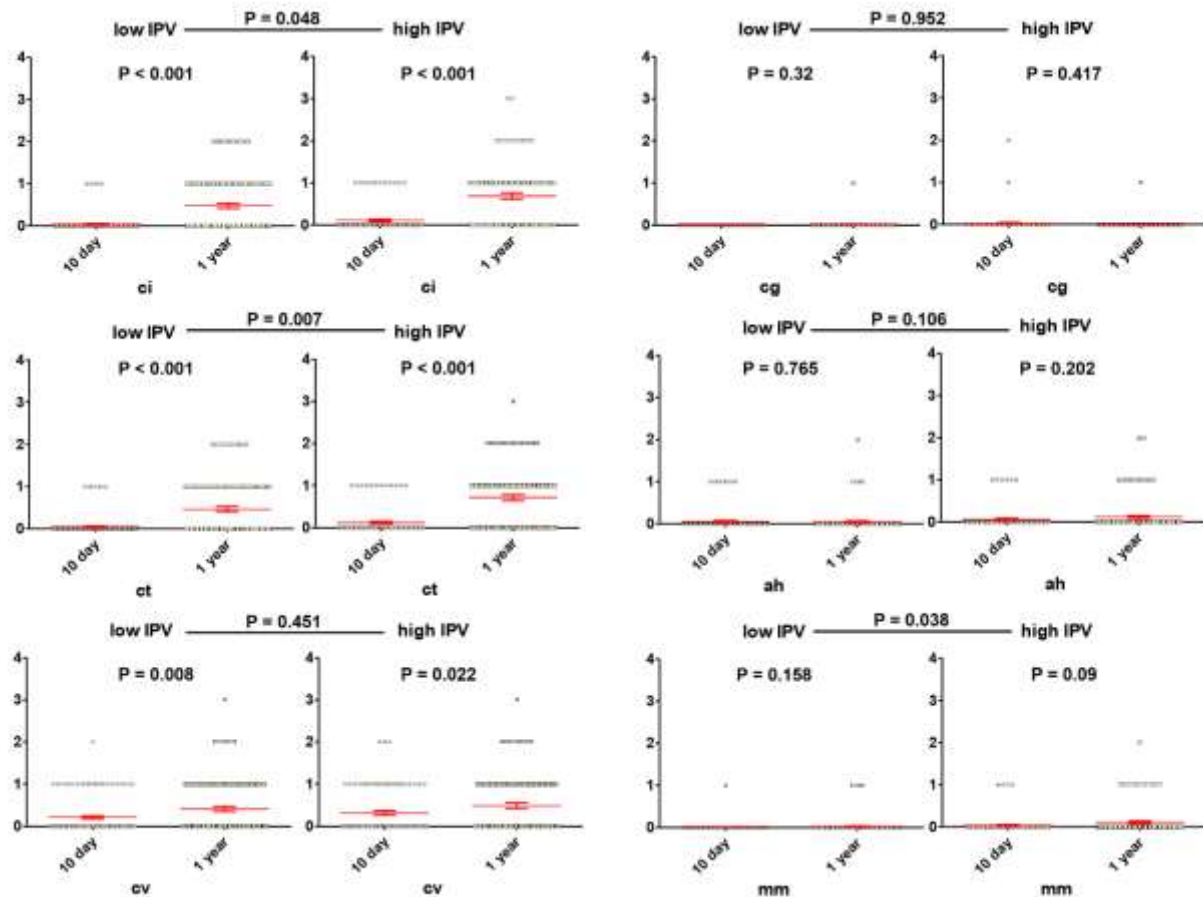

Supplement: txd-5-e455-s001.pdf [file txd-5-e455-s001.pdf]
